# Supplementary material for: Recurrent Targeted Genes of Hepatitis B Virus in the Liver Cancer Genomes Identified by a Next-Generation Sequencing–Based Approach
Source: PLoS Genet. 2012 Dec 6;8(12):e1003065. doi: 10.1371/journal.pgen.1003065 (PMC3516541; doi:10.1371/journal.pgen.1003065)
Supplement: Table S5 — PCR confirmation of putative HBV integration sites. (XLS) [file pgen.1003065.s007.xls]

## Sheet: Sheet1
Table S5. PCR confirmation of putative HBV integration sites
No.	Insertion	First Round Primer	Nested Primer	PCR Validation
1	N9+chr1-1	CTGGGTACACGGTGAGTAGAATTGAGA	GTGTTACAGTTGGTGTCTTGGGATGTC	Y
2	N9+chr10-1	TCCCAACAAGTTCCTCATCTCCATC	CCCATTCCCATGATTCAATTATCTCC	Y
3	N7-chr11-1	TTGCCCCGTAAATTATTCTTAACCGT	CAGAAATCTTCCACAAAGTGAAATGCC	Y
4	N12+chr12-1	GGGGCTACCAAAGGGCAAGACA	AATATGTGGGTCAAACCTAAAGCAACC	Y
5	N13+chr13-1	GCTCAGCAGGCATTTAAGCGAAGT	GACAGACGGTTGAACAGTAAGGAGGA	Y
6	N7+ch13-1	GCCACAAGCCAAGCCAATCAG	CAGGAACCCAAGCGGTGTCAGT	Y
7	N7-chr14-1	CCCAGGACCTCGCATGAGTGA	CATTTCTCCAAAGCCTCCGTTCC	Y
8	N12-chr16-1	CCCTCCGTCCCATCTGAACCATT	GGCAAGGGTCAAAGCCAAGGTAT	Y
9	N13-chr18-1	CCTCTGCCTGTTCCTTGGAGTTTT	TTCATTTCCTTCTCCCTCCTTTGC	Y
10	N13-chr18-2	GGTGCCAAAGTGGGTCCTGGATAT	CTGTCTCAACAATGCTTTCGCTCC	N
11	N13-chr2-1	ACCAGACAAGGTTGTTATGACCCAAA	GATTACGGGCATGAGGCACCAC	Y
12	N17-chr2-1	CCCCAAAGTGGTTTACGAATG	GCTGTGGCTTGCGAAAACTGTCTT	Y
13	N13-chr2-1	CTCAAATGTCTAAAAGGACCAGGGAGA	AGGAAACCCAAAACTAGAGCAATT	Y
14	N9-chr21-1	TGCACTCATCGTCACAGATAATCTTCC	TGCAAGAATCTGAGGCCCCAAT	Y
15	N7+chr3-1	CATATCCTGGGACCCACAAAGTGAC	GTGTTTGAGTGGCATTGCTTGATGT	Y
16	N13-chr3-1	GGGATGATGGGAGCATTGGAGATT	GGTGGAGGGCAGAGGTCAAGAAATA	Y
17	N12-chr3-1	TGTTTTGGACTTCCTGTGAAATGGGT	TTGCCAGCATTGTGCATTCATTTA	Y
18	N13-chr3-2	CAAACATTTGCCACAGGTGGTGG	GCCGTGCCTTCCATAAAGAT	Y
19	N16-chr5-1	GGACCGACTACCTAATTGCAGTCAAAG	AATGGCTTTGTGGGAAGGTAGTTTG	Y
20	N13+chr6-1	TGTGAAGGGTAGGCTGGGGATG	TCTGGCTACCAGCAGGATGCCT	Y
21	N13-chr6-1	ATGGAAGGTCGGTGGGCAGAG	GGTGACCAATAGGATAGGGCAGAAGC	Y
22	N9-chr7-1	GCTTGCATCCGTCAATATGTAGC	GCCACCACTTGTCTGAATTAGCCTTC	Y
23	N9+chr7-1	GCTCCCTGAGAACAAGGGCTAGG	TAGAAGGCGGCATTAGGGCTGTG	Y
24	N13-chr7-1	CATGACATTGGTTGATGGCTCTGC	TTCTGGGTCAGCATTTCATGTTCG	Y
25	N13+chr7-1	GGAAGGGACCGCATGAGCAAT	CCAAAGAGGGCACTAAATGAACAGG	Y
26	N13+chr7-2	ATGACAACCAAGAAAGGTGGCAATT	CCTTGGGAAACAGCAAGCTACATG	Y
27	N12-chr8-1	GGAGAACCCACATGGCTCTTTGA	TGCAGAAGCTGAGCAGGAGAACA	Y
28	N13-chrX-1	GGAATCAACCCAAATGTCCATCAACT	GGATATGAGGTTTCCTTCATGGGTGA	Y
